# Supplementary material for: Antiseptic susceptibility profiles of canine pyoderma-associated staphylococci in Japan: first identification of plasmid-borne smr in Staphylococcus coagulans
Source: Front Vet Sci. 2025 Sep 8;12:1621915. doi: 10.3389/fvets.2025.1621915 (PMC12450657; doi:10.3389/fvets.2025.1621915)
Supplement: Supplementary file 1 [file Table_1.xlsx]

## Sheet: Supplementary Table 1
Supplementary Table 1. Metadata of Staphylococcus pseudintermedius and Staphylococcus coagulans isolates from canine pyoderma
Strain	Species	Collection date	Isolation date	Geographic location	Host species	Sample source	Disease
SP1	S. pseudintermedius	ND	2023-07-06	Japan: Hyogo	Dog	Skin	Superficial pyoderma
SP2	S. pseudintermedius	2023-07-04	2023-07-06	Japan: Chiba	Dog	Skin	Superficial pyoderma
SP3	S. pseudintermedius	2023-06-05	2023-07-06	Japan: Hyogo	Dog	Skin	Superficial pyoderma
SP4	S. pseudintermedius	ND	2023-07-07	Japan: Tokyo	Dog	Skin	Superficial pyoderma
SP5	S. pseudintermedius	2023-07-06	2023-07-07	Japan: Aichi	Dog	Skin	Superficial pyoderma
SP6	S. pseudintermedius	ND	2023-07-07	Japan: Tokyo	Dog	Skin	Superficial pyoderma
SP7	S. pseudintermedius	2023-07-05	2023-07-07	Japan: Okayama	Dog	Skin	Superficial pyoderma
SP8	S. pseudintermedius	2023-07-06	2023-07-07	Japan: Ishikawa	Dog	Skin	Superficial pyoderma
SP9	S. pseudintermedius	2023-07-06	2023-07-07	Japan: Saitama	Dog	Skin	Superficial pyoderma
SP10	S. pseudintermedius	ND	2023-07-07	Japan: Tokyo	Dog	Skin	Superficial pyoderma
SP11	S. pseudintermedius	ND	2023-07-07	Japan: Hiroshima	Dog	Skin	Superficial pyoderma
SP12	S. pseudintermedius	2023-07-07	2023-07-08	Japan: Tokyo	Dog	Skin	Superficial pyoderma
SP13	S. pseudintermedius	2023-07-06	2023-07-08	Japan: Saitama	Dog	Skin	Superficial pyoderma
SP14	S. pseudintermedius	2023-07-06	2023-07-08	Japan: Miyagi	Dog	Skin	Superficial pyoderma
SP15	S. pseudintermedius	2023-07-07	2023-07-08	Japan: Shizuoka	Dog	Skin	Superficial pyoderma
SP16	S. pseudintermedius	2023-07-07	2023-07-08	Japan: Tokyo	Dog	Skin	Superficial pyoderma
SP17	S. pseudintermedius	ND	2023-07-08	Japan: Hokkaido	Dog	Skin	Superficial pyoderma
SP18	S. pseudintermedius	2023-07-07	2023-07-08	Japan: Tokyo	Dog	Skin	Superficial pyoderma
SP19	S. pseudintermedius	2023-07-07	2023-07-08	Japan: Mie	Dog	Skin	Superficial pyoderma
SP20	S. pseudintermedius	2023-07-08	2023-07-09	Japan: Osaka	Dog	Skin	Superficial pyoderma
SP21	S. pseudintermedius	2023-07-05	2023-07-09	Japan: Kanagawa	Dog	Skin	Superficial pyoderma
SP22	S. pseudintermedius	2023-07-08	2023-07-09	Japan: Chiba	Dog	Skin	Superficial pyoderma
SP23	S. pseudintermedius	2023-07-06	2023-07-09	Japan: Nagano	Dog	Skin	Superficial pyoderma
SP24	S. pseudintermedius	2023-07-08	2023-07-09	Japan: Gifu	Dog	Skin	Superficial pyoderma
SP25	S. pseudintermedius	2023-07-07	2023-07-09	Japan: Aichi	Dog	Skin	Superficial pyoderma
SP26	S. pseudintermedius	2023-07-08	2023-07-09	Japan: Mie	Dog	Skin	Superficial pyoderma
SP27	S. pseudintermedius	ND	2023-07-09	Japan: Kanagawa	Dog	Skin	Superficial pyoderma
SP28	S. pseudintermedius	ND	2023-07-09	Japan: Saitama	Dog	Skin	Superficial pyoderma
SP29	S. pseudintermedius	2023-07-08	2023-07-09	Japan: Tokyo	Dog	Skin	Superficial pyoderma
SP30	S. pseudintermedius	2023-07-09	2023-07-10	Japan: Tokyo	Dog	Skin	Superficial pyoderma
SP31	S. pseudintermedius	2023-07-05	2023-07-10	Japan: Kanagawa	Dog	Skin	Superficial pyoderma
SP32	S. pseudintermedius	2023-07-06	2023-07-10	Japan: Chiba	Dog	Skin	Superficial pyoderma
SP33	S. pseudintermedius	2023-07-08	2023-07-10	Japan: Gifu	Dog	Skin	Superficial pyoderma
SP34	S. pseudintermedius	2023-07-05	2023-07-10	Japan: Tokyo	Dog	Skin	Superficial pyoderma
SP35	S. pseudintermedius	2023-07-09	2023-07-10	Japan: Osaka	Dog	Skin	Superficial pyoderma
SP36	S. pseudintermedius	2023-07-09	2023-07-10	Japan: Osaka	Dog	Skin	Superficial pyoderma
SP37	S. pseudintermedius	2023-07-09	2023-07-10	Japan: Chiba	Dog	Skin	Superficial pyoderma
SP38	S. pseudintermedius	2023-07-08	2023-07-10	Japan: Fukuoka	Dog	Skin	Superficial pyoderma
SP39	S. pseudintermedius	2023-07-08	2023-07-10	Japan: Chiba	Dog	Skin	Superficial pyoderma
SP40	S. pseudintermedius	2023-07-08	2023-07-10	Japan: Nagano	Dog	Skin	Superficial pyoderma
SP41	S. pseudintermedius	ND	2023-07-10	Japan: Tokyo	Dog	Skin	Superficial pyoderma
SP42	S. pseudintermedius	2023-07-09	2023-07-10	Japan: Ishikawa	Dog	Skin	Superficial pyoderma
SP43	S. pseudintermedius	2023-07-10	2023-07-11	Japan: Saitama	Dog	Skin	Superficial pyoderma
SP44	S. pseudintermedius	2023-07-10	2023-07-11	Japan: Tokyo	Dog	Skin	Superficial pyoderma
SP45	S. pseudintermedius	2023-07-09	2023-07-11	Japan: Kanagawa	Dog	Skin	Superficial pyoderma
SP46	S. pseudintermedius	2023-07-09	2023-07-11	Japan: Kyoto	Dog	Skin	Superficial pyoderma
SP47	S. pseudintermedius	2023-07-10	2023-07-11	Japan: Aichi	Dog	Skin	Superficial pyoderma
SP48	S. pseudintermedius	2023-07-08	2023-07-11	Japan: Okayama	Dog	Skin	Superficial pyoderma
SP49	S. pseudintermedius	2023-07-09	2023-07-11	Japan: Nara	Dog	Skin	Superficial pyoderma
SP50	S. pseudintermedius	2023-07-10	2023-07-12	Japan: Hyogo	Dog	Skin	Superficial pyoderma
SP51	S. pseudintermedius	2023-07-11	2023-07-12	Japan: Ibaraki	Dog	Skin	Superficial pyoderma
SP52	S. pseudintermedius	2023-07-09	2023-07-12	Japan: Hyogo	Dog	Skin	Superficial pyoderma
SP53	S. pseudintermedius	2023-07-09	2023-07-12	Japan: Hyogo	Dog	Skin	Superficial pyoderma
SP54	S. pseudintermedius	2023-07-08	2023-07-13	Japan: Niigata	Dog	Skin	Superficial pyoderma
SP55	S. pseudintermedius	2023-07-11	2023-07-13	Japan: Saitama	Dog	Skin	Superficial pyoderma
SP56	S. pseudintermedius	2023-07-12	2023-07-13	Japan: Miyagi	Dog	Skin	Superficial pyoderma
SP57	S. pseudintermedius	2023-07-11	2023-07-13	Japan: Tochigi	Dog	Skin	Superficial pyoderma
SP58	S. pseudintermedius	2023-07-11	2023-07-13	Japan: Tokyo	Dog	Skin	Superficial pyoderma
SP59	S. pseudintermedius	2023-07-12	2023-07-13	Japan: Osaka	Dog	Skin	Superficial pyoderma
SP60	S. pseudintermedius	2023-07-11	2023-07-13	Japan: Okayama	Dog	Skin	Superficial pyoderma
SC1	S. coagulans	2023-06-07	2023-06-12	Japan: Osaka	Dog	Skin	Superficial pyoderma
SC2	S. coagulans	2023-06-10	2023-06-12	Japan: Tokyo	Dog	Skin	Superficial pyoderma
SC3	S. coagulans	2023-06-12	2023-06-13	Japan: Chiba	Dog	Skin	Superficial pyoderma
SC4	S. coagulans	2023-06-10	2023-06-14	Japan: Hyogo	Dog	Skin	Superficial pyoderma
SC5	S. coagulans	2023-06-14	2023-06-16	Japan: Kanagawa	Dog	Skin	Superficial pyoderma
SC6	S. coagulans	2023-06-15	2023-06-16	Japan: Tokyo	Dog	Skin	Superficial pyoderma
SC7	S. coagulans	2023-06-16	2023-06-17	Japan: Hyogo	Dog	Skin	Superficial pyoderma
SC8	S. coagulans	2023-06-16	2023-06-17	Japan: Wakayama	Dog	Skin	Superficial pyoderma
SC9	S. coagulans	ND	2023-06-18	Japan: Saitama	Dog	Skin	Superficial pyoderma
SC10	S. coagulans	2023-06-16	2023-06-18	Japan: Tokyo	Dog	Skin	Superficial pyoderma
SC11	S. coagulans	2023-06-16	2023-06-18	Japan: Fukuoka	Dog	Skin	Superficial pyoderma
SC12	S. coagulans	2023-06-17	2023-06-19	Japan: Hyogo	Dog	Skin	Superficial pyoderma
SC13	S. coagulans	2023-06-18	2023-06-19	Japan: Osaka	Dog	Skin	Superficial pyoderma
SC14	S. coagulans	2023-06-16	2023-06-20	Japan: Tokyo	Dog	Skin	Superficial pyoderma
SC15	S. coagulans	2023-06-17	2023-06-20	Japan: Osaka	Dog	Skin	Superficial pyoderma
SC16	S. coagulans	2023-06-21	2023-06-22	Japan: Chiba	Dog	Skin	Superficial pyoderma
SC17	S. coagulans	2023-06-24	2023-06-22	Japan: Wakayama	Dog	Skin	Superficial pyoderma
SC18	S. coagulans	2023-06-21	2023-06-23	Japan: Osaka	Dog	Skin	Superficial pyoderma
SC19	S. coagulans	2023-06-20	2023-06-24	Japan: Hokkaido	Dog	Skin	Superficial pyoderma
SC20	S. coagulans	2023-06-24	2023-06-25	Japan: Kanagawa	Dog	Skin	Superficial pyoderma
SC21	S. coagulans	2023-06-24	2023-06-25	Japan: Osaka	Dog	Skin	Superficial pyoderma
SC22	S. coagulans	2023-06-23	2023-06-27	Japan: Osaka	Dog	Skin	Superficial pyoderma
SC23	S. coagulans	2023-06-26	2023-06-27	Japan: Hyogo	Dog	Skin	Superficial pyoderma
SC24	S. coagulans	2023-06-26	2023-06-28	Japan: Saitama	Dog	Skin	Superficial pyoderma
SC25	S. coagulans	2023-06-26	2023-06-28	Japan: Hiroshima	Dog	Skin	Superficial pyoderma
SC26	S. coagulans	2023-06-28	2023-06-29	Japan: Chiba	Dog	Skin	Superficial pyoderma
SC27	S. coagulans	2023-06-28	2023-06-30	Japan: Aichi	Dog	Skin	Superficial pyoderma
SC28	S. coagulans	2023-06-28	2023-06-30	Japan: Osaka	Dog	Skin	Superficial pyoderma
SC29	S. coagulans	2023-06-29	2023-07-01	Japan: Osaka	Dog	Skin	Superficial pyoderma
SC30	S. coagulans	2023-06-30	2023-07-01	Japan: Kyoto	Dog	Skin	Superficial pyoderma
SC31	S. coagulans	2023-07-01	2023-07-02	Japan: Ishikawa	Dog	Skin	Superficial pyoderma
SC32	S. coagulans	2023-06-30	2023-07-02	Japan: Saitama	Dog	Skin	Superficial pyoderma
SC33	S. coagulans	2023-07-01	2023-07-03	Japan: Shizuoka	Dog	Skin	Superficial pyoderma
SC34	S. coagulans	2023-07-01	2023-07-03	Japan: Tokyo	Dog	Skin	Superficial pyoderma
SC35	S. coagulans	2023-06-26	2023-07-03	Japan: Tokyo	Dog	Skin	Superficial pyoderma
SC36	S. coagulans	2023-07-03	2023-07-04	Japan: Tokyo	Dog	Skin	Superficial pyoderma
SC37	S. coagulans	ND	2023-07-04	Japan: Kanagawa	Dog	Skin	Superficial pyoderma
SC38	S. coagulans	2023-07-02	2023-07-04	Japan: Saitama	Dog	Skin	Superficial pyoderma
SC39	S. coagulans	2023-07-02	2023-07-04	Japan: Shiga	Dog	Skin	Superficial pyoderma
SC40	S. coagulans	2023-07-04	2023-07-05	Japan: Kanagawa	Dog	Skin	Superficial pyoderma
